# Supplementary material
Source: MDPI journal article supplement (https://www.mdpi.com/2072-4292/13/14/2648)
Supplement: s1 [file s1]

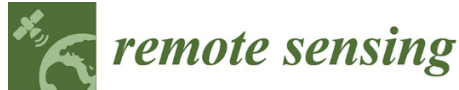

Supporting Information for

## **Enhanced Oceanic Environmental Responses and Feedbacks to Super Typhoon Nida (2009) during the Sudden-turning Stage**

Jiagen Li<sup>1</sup>, Yuanjian Yang<sup>2,3</sup>, Guihua Wang<sup>4</sup>, Hao Cheng<sup>1</sup>, Liang Sun<sup>1\*</sup>

<sup>1</sup>School of Earth and Space Sciences, University of Science and Technology of China, Hefei, 230000, China

<sup>2</sup>School of Atmospheric Physics, Nanjing University of Information Science and Technology, Nanjing, 210000, China

<sup>3</sup>Guangdong Key Laboratory of Ocean Remote Sensing, South China Sea Institute of Oceanology, Chinese Academy of Sciences, Guangzhou, 510000, China

<sup>4</sup>Department of Atmospheric and Oceanic Sciences, Fudan University, Shanghai, 200000, China

### **Contents of this file**

1. Figures S1
2. Figures S2
3. Figures S3
4. Figures S4
5. Figures S5
6. Figures S6
7. Figures S7
8. Figures S8

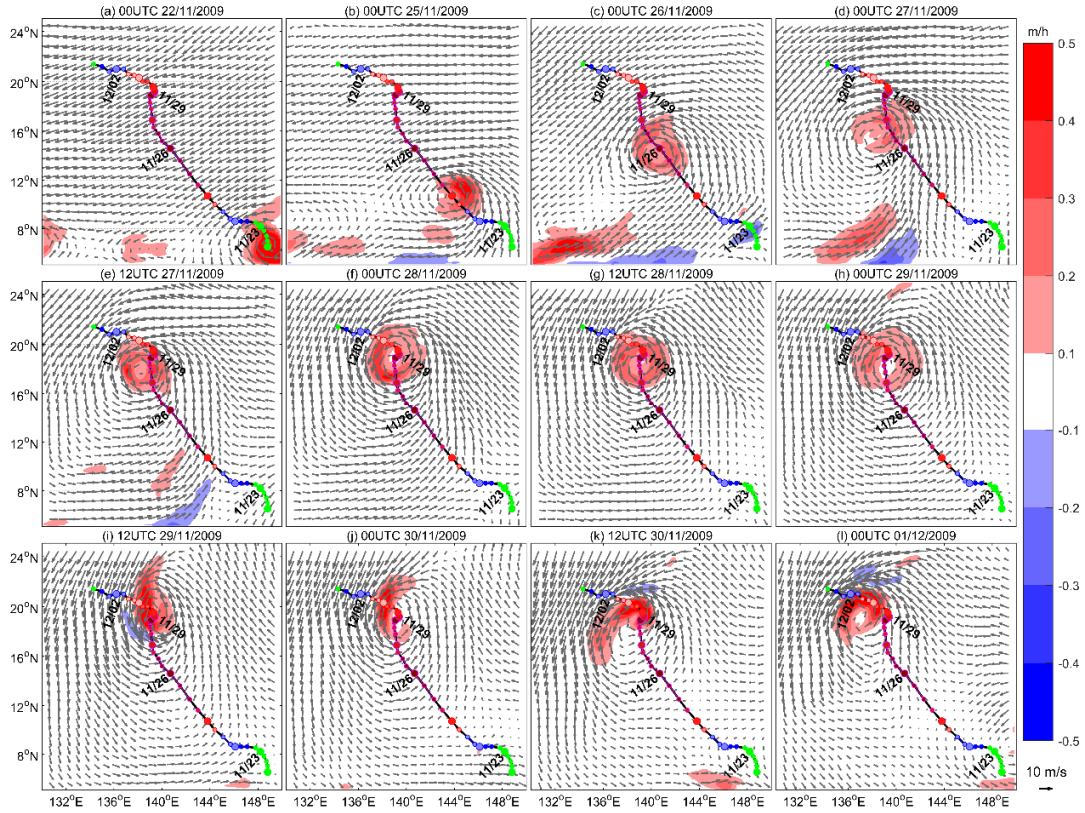

**Figure S1.** The wind fields at 10 m (arrows) and the Ekman pumping velocity (shaded, positive value is upwelling) during the passage of Typhoon Nida (November 22 - December 1, 2009). The track line color indicated the max-sustained wind.

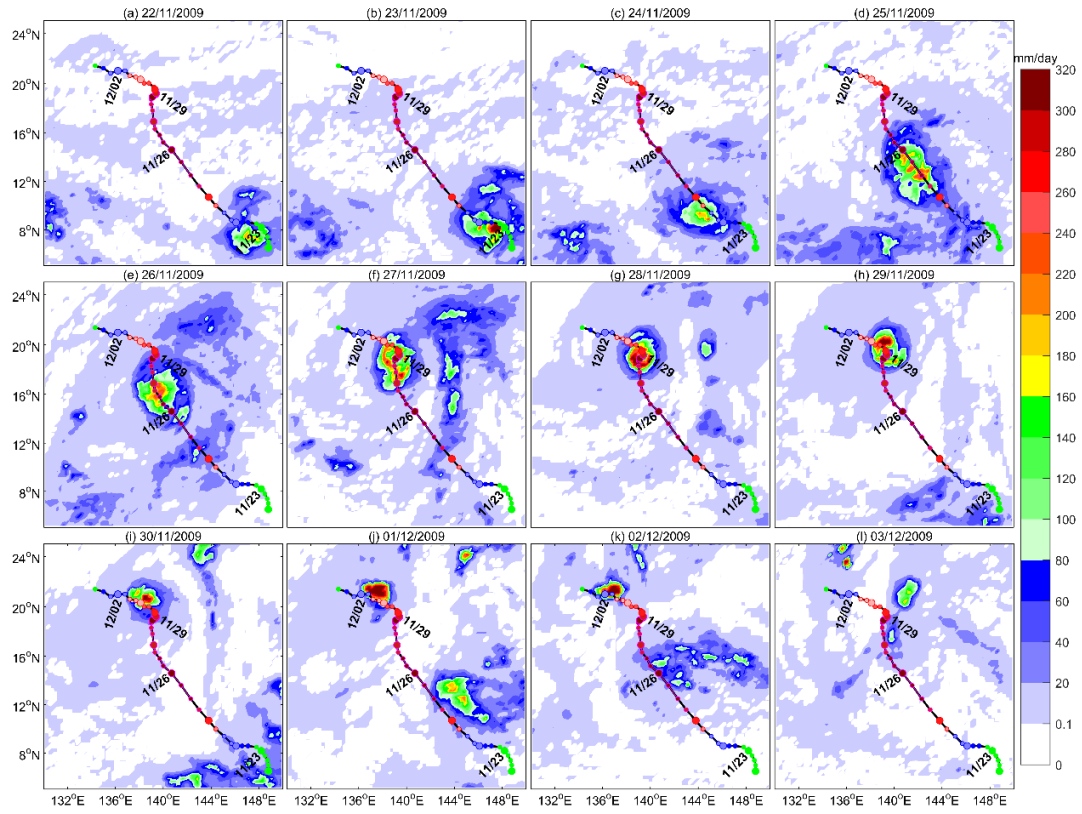

**Figure S2.** Evolution of daily precipitation during the passage of typhoon Nida (November 22 - December 1, 2009). The track line color indicated the max-sustained wind.

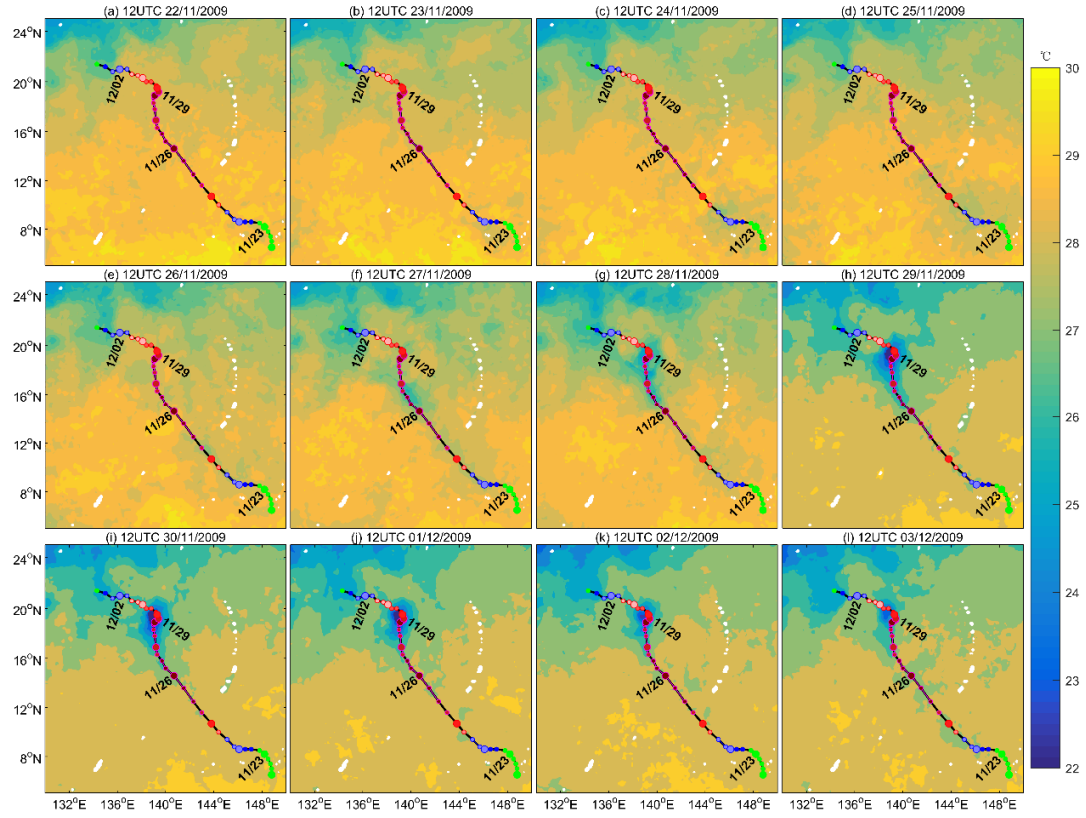

**Figure S3.** Evolution of daily SST (shaded, °C) during the passage of typhoon Nida (November 22 - December 3, 2009). The track line color indicated the max-sustained wind.

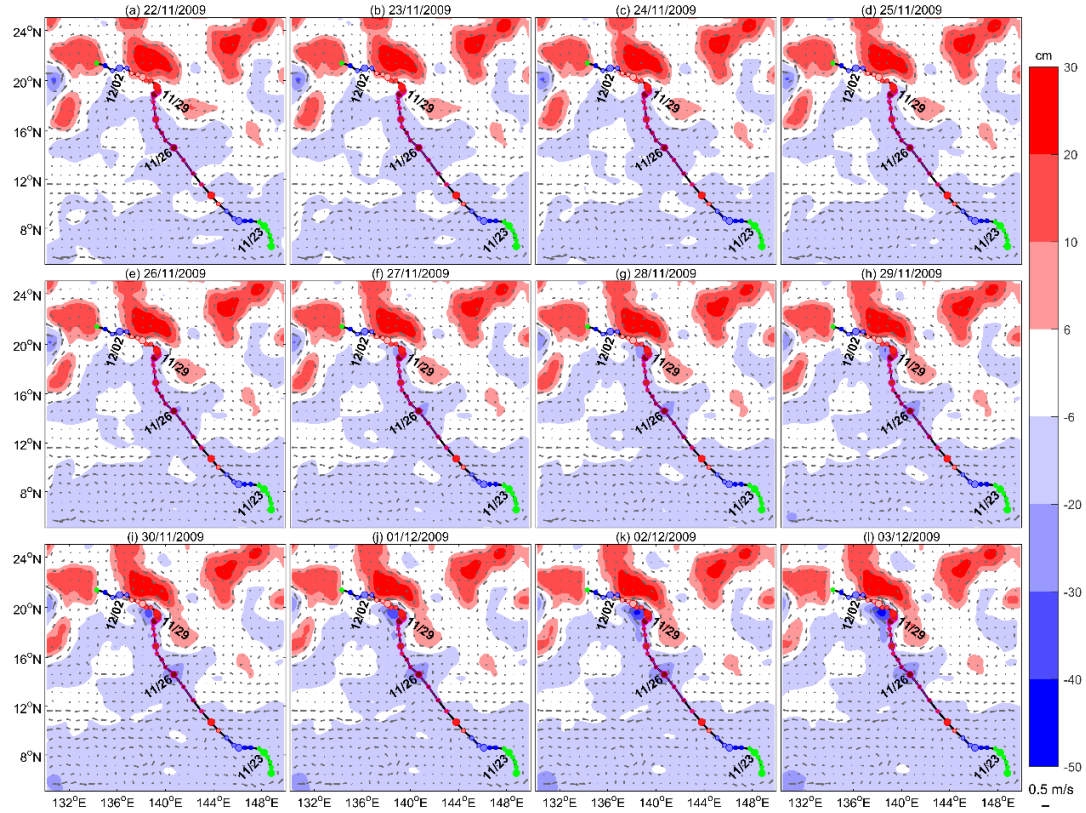

**Figure S4.** Evolution of the altimeter-derived SSHA (shaded, cm) and surface geostrophic velocity (arrows) during the passage of typhoon Nida (November 22 - December 3, 2009). The track line color indicated the max-sustained wind of typhoon.

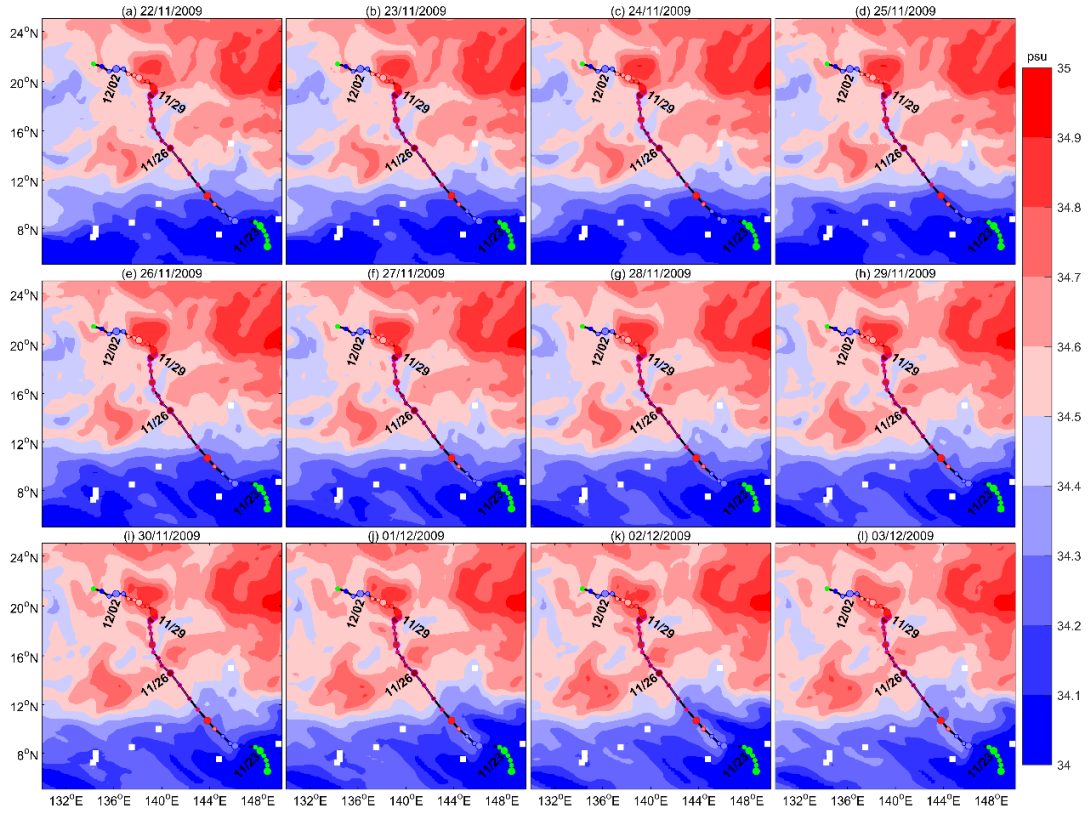

**Figure S5.** Evolution of daily SSS (shaded, cm) during the passage of typhoon Nida. The track line color indicated the max-sustained wind of typhoon (November 22 - December 3, 2009).

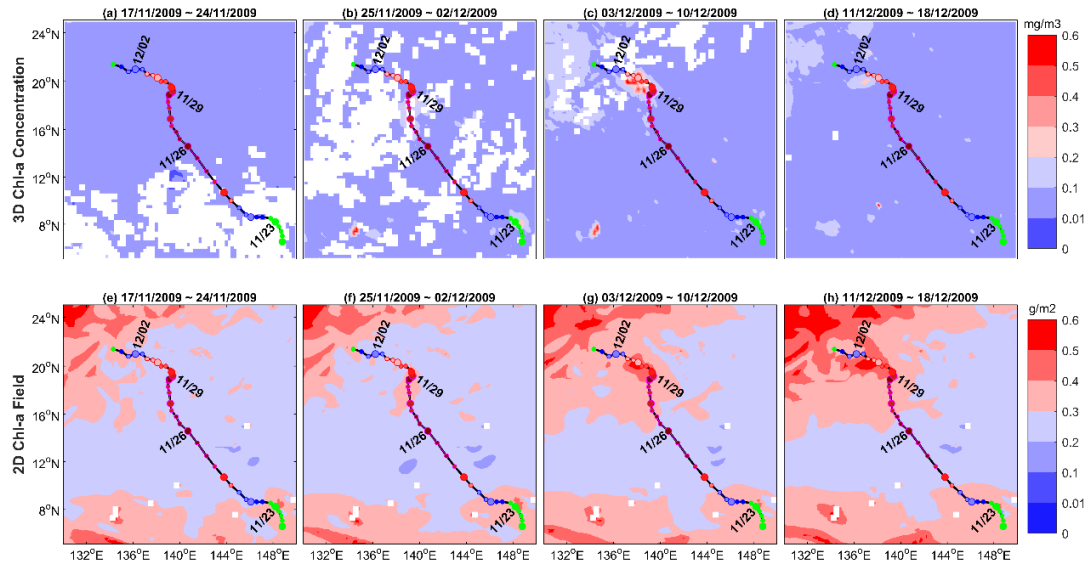

**Figure S6.** (a - d) Evolution of weekly Chlorophyll concentration (shaded,  $\text{mg}/\text{m}^3$ ), (e - h) Evolution of weekly 2D fields of zooplankton (shaded,  $\text{g}/\text{m}^2$ ) during the passage of typhoon Nida (November 17 - December 18, 2009). The track line color indicated the max-sustained wind of typhoon.



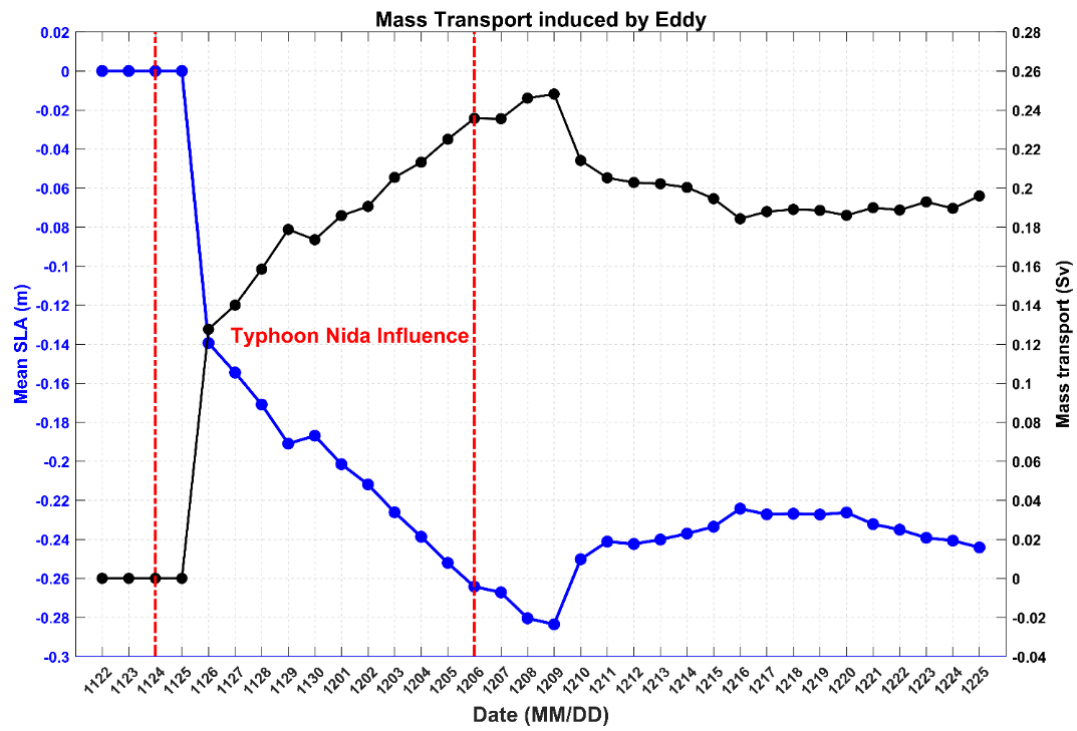

**Figure S7.** Evolutions of mean SSHA within the cold eddy and the mass transport induced by the cold eddy on the left side of the track in the second Category 5 stage.



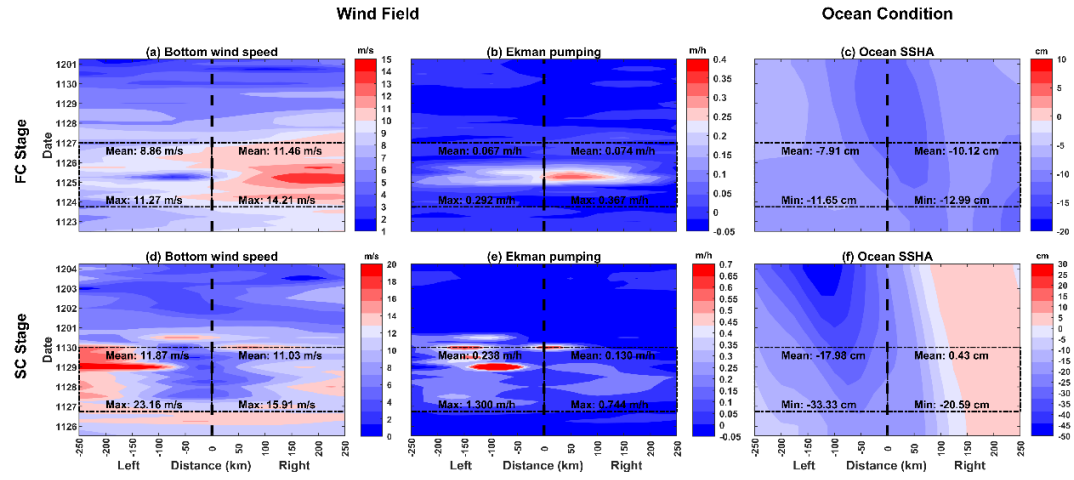

**Figure S8.** Comparison of typhoon wind field and ocean condition on the left-hand and right-hand side of typhoon track in FC stage and SC stage respectively, extracted from Figure 3 and Figure 4.
